# Supplementary material
Source: Springer Nature journal article supplement (https://www.springermedizin.de/resource/supplementary/12905_2009_163_MOESM2_ESM.pdf/9519216)

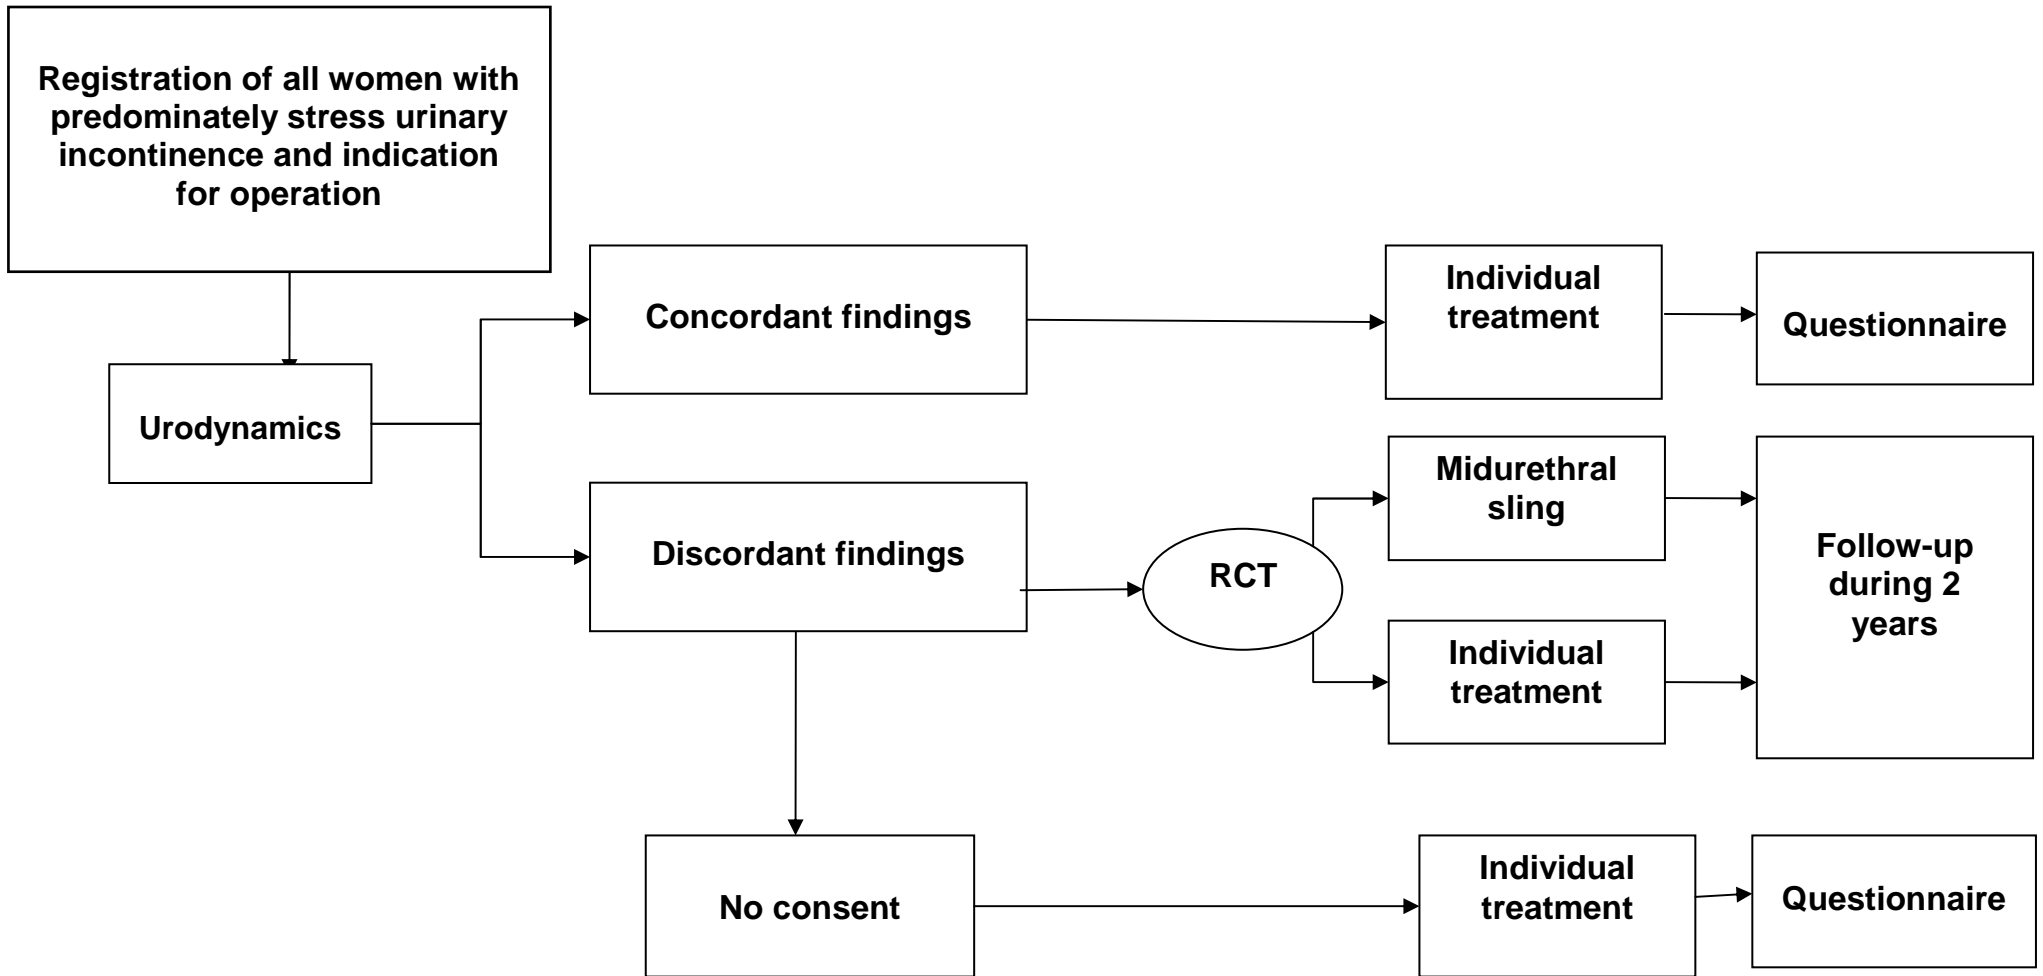

Supplement: MOESM2 [file 9519216]
